# Supplementary material
Source: publisher figshare collection journal article supplement (https://frontiersin.figshare.com/ndownloader/files/31053907)
Supplement: Supplementary file 1 [file 31053907]

**Numerical study of thermal shock damage mechanism of polycrystalline ceramics**

Zhenyuan Gonga, Kang Guana[[1]](#footnote-1), Pinggen Raoa[[2]](#footnote-2), Qingfeng Zengb,c, Jiantao Liud, Zhiqiang Fengc,e,f

a *School of Materials Science and Engineering, South China University of Technology, Guangzhou 510640, China*

b *Science and Technology on Thermostructural Composite Materials Laboratory, School of Materials Science and Engineering, Northwestern Polytechnical University, Xi'an 710072, China*

c *MSEA International Institute for Materials Genome, Gu'an 065500, Hebei, China*

d *School of Mechanical Engineering, Southwest Jiaotong University, Chengdu, Sichuan 610031, China*

e *School of Mechanics and Engineering, Southwest Jiaotong University, Chengdu, Sichuan 610031, China*

f *Laboratoire de Mécanique et d’Energétique, Université d’Evry, Evry 91020, France*

This file contains

**Fig. S1** The final crack patterns of different grain size models.

**Fig. S2** Schematic of total failure of the RVE models with different grain boundary fracture energies.

**Fig. S1** shows the final crack patterns of different grain size model. Due to the convergence problem of multiple cracks growth, the step time of final crack patterns is less than 1 s.


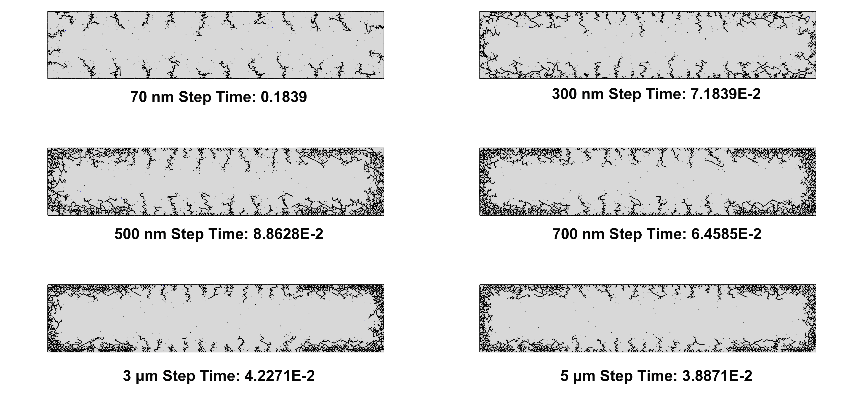


**Fig. S1** The final crack patterns of different grain size models.

**Fig. S2** shows the total failure of the RVE models with different grain boundary energies. When the grain boundary fracture energy increases to 5.2 J/m2. The fracture mode changes from intergranular fracture to transgranular fracture.


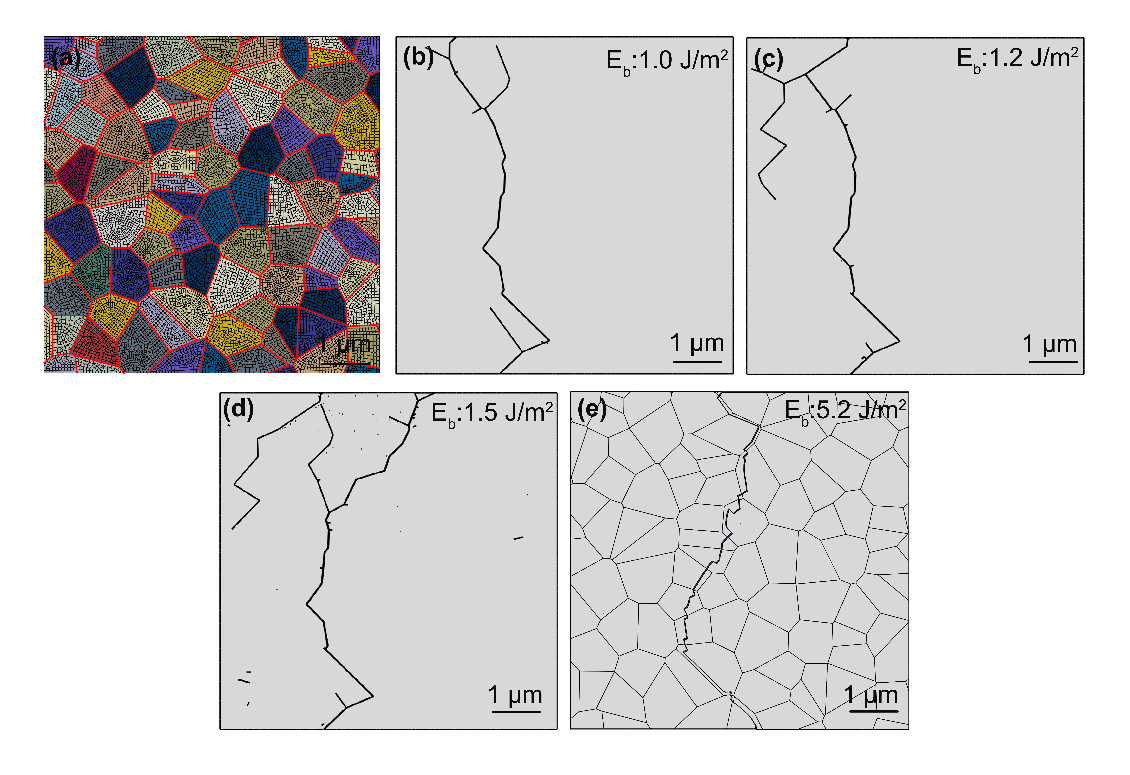


**Fig. S1** Schematic of total failure of the RVE models with different grain boundary fracture energies.

1. Corresponding author. E-mail address: mskguan@scut.edu.cn (K Guan). [↑](#footnote-ref-1)
2. Corresponding author. E-mail address: pgrao@scut.edu.cn (P Rao). [↑](#footnote-ref-2)
